# Supplementary material for: OVOL2 induces mesenchymal-to-epithelial transition in fibroblasts and enhances cell-state reprogramming towards epithelial lineages
Source: Sci Rep. 2019 Apr 24;9:6490. doi: 10.1038/s41598-019-43021-z (PMC6482152; doi:10.1038/s41598-019-43021-z)

## Manuscript title

# **OVOL2 induces mesenchymal-to-epithelial transition in fibroblasts and enhances cell-state reprogramming towards epithelial lineages**

Kazuhide Watanabe<sup>1,\*</sup>, Ye Liu<sup>1</sup>, Shuhei Noguchi<sup>1</sup>, Madeleine Murray<sup>1</sup>, Jen-Chien Chang<sup>1</sup>, Mami Kishima<sup>1</sup>, Hajime Nishimura<sup>1</sup>, Kosuke Hashimoto<sup>1</sup>, Aki Minoda<sup>1</sup>, and Harukazu Suzuki<sup>1,\*</sup>

<sup>1</sup> RIKEN Center for Integrative Medical Sciences, 1-7-22 Suehiro-cho, Tsurumi-ku, Yokohama, Kanagawa 230-0045, Japan

\* To whom correspondence should be addressed. Tel: +81-45-503-9222; Fax: +81-45-503-9216; Email: harukazu.suzuki@riken.jp Correspondence may also be addressed to [kazuhide.watanabe@riken.jp](mailto:kazuhide.watanabe@riken.jp)

## SUPPLEMENTAL TABLES

**Table S1. List of E-, K-, M-, and F-specific marker genes**

Provided as an Excel file

**Table S2. Accessibility score of TF motifs**

Provided as an Excel file

**Table S3. Primers used in this study**

| Target gene             | Forward primer         | Reverse primer        |
|-------------------------|------------------------|-----------------------|
| <i>CDH1</i>             | AAAGGCCCATTTCTAAAAACCT | TGCGTTCTCTATCCAGAGGCT |
| <i>VIM</i>              | GACGCCATCAACACCGAGTT   | CTTTGTCGTTGGTTAGCTGGT |
| <i>KRT14</i>            | GCGGCCTGTCTGTCTCAT     | TGAGCCGCATTCTGAACGAG  |
| <i>TP63(endogenous)</i> | GGTCCCCACAGAGCAAGA     | TGCAATGACAGCCCTTGA    |

## SUPPLEMENTAL FIGURE LEGENDS

### Figure S1. Correlation between the expression of representative E and M markers.

(A) Analysis with CCLE datasets. Pearson correlation coefficient  $r$  was calculated between each transcript and representative E genes (CDH1, EPCAM, KRT19, and TJP1) and M genes (VIM, MMP3, CDH2, and FN1) across 1038 microarrays for cancer cell lines. The correlation coefficient  $r$  for each transcript between the indicated combinations of E and M markers is shown in the scatter plots. (B) Analysis with FANTOM5 datasets. Expression correlation was analyzed across 1829 CAGE data for normal cells, as described in (A).

### Figure S2. Expression correlation analysis of FANTOM5-defined TFs with FANTOM5 CAGE datasets.

Among 1995 FANTOM5-defined TFs, 1675 TF transcripts were identified in the FANTOM5 datasets. The Pearson correlation coefficient  $r$  was calculated between each transcript and *CDH1* or *VIM* across 1829 FANTOM5 CAGE data for normal cell types. Representative EMT-TFs (blue) and 16 candidate MET-TFs (red) were labeled.

### Figure S3. Heatmap and unsupervised clustering by CAGE and ATAC-seq.

Heatmap with unsupervised clustering of the indicated samples and annotated marker genes for E, M states and keratinocytes by CAGE (A) and ATAC-seq (B). The top differentially expressed genes and differentially regulated ATAC-seq peaks between control fibroblasts (Control) and primary keratinocytes were used for the analysis. Note that all replicate pairs are co-aggregated at the first level of the dendrogram and the TK + OVOL2 samples changed their expression pattern toward keratinocytes.

### Figure S4. Changes in motif accessibility and expression of TFs during reprogramming (ZEB1 and ID3).

Motif accessibility and TF genes expression. Motif enrichment score (Z score) and CAGE expression (logTPM) are shown in the top and bottom panels, respectively, for the indicated TFs.

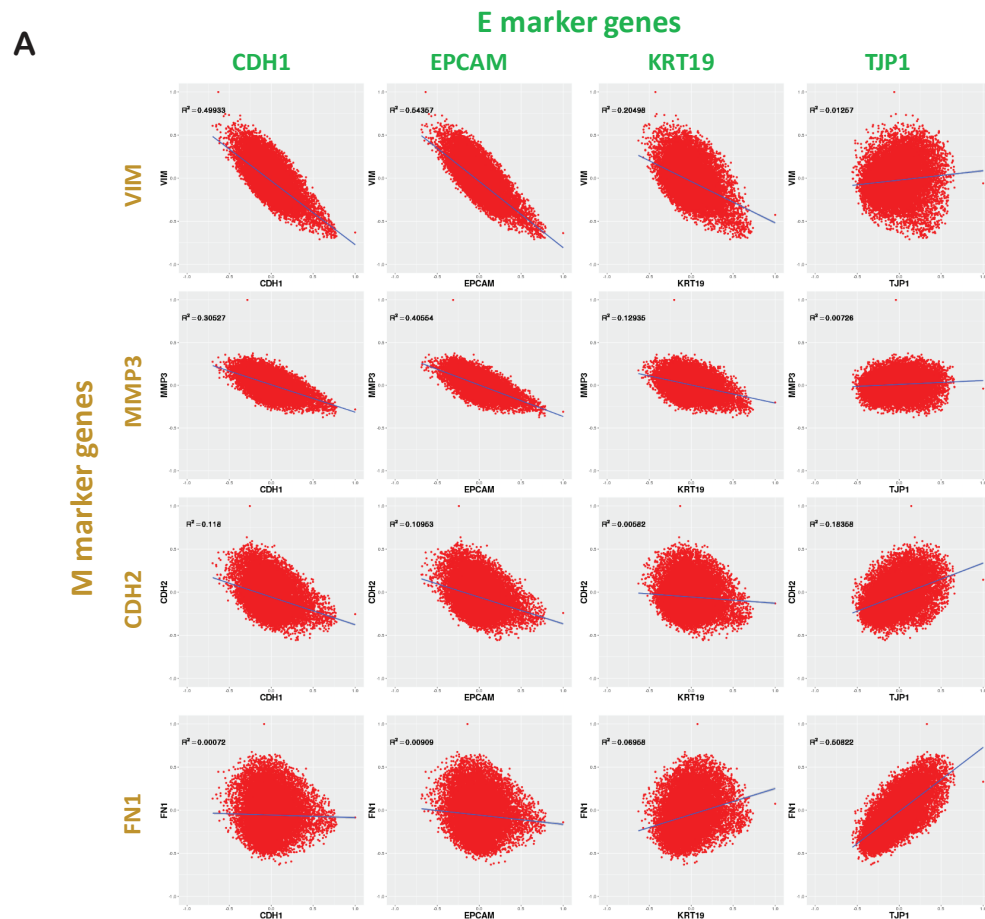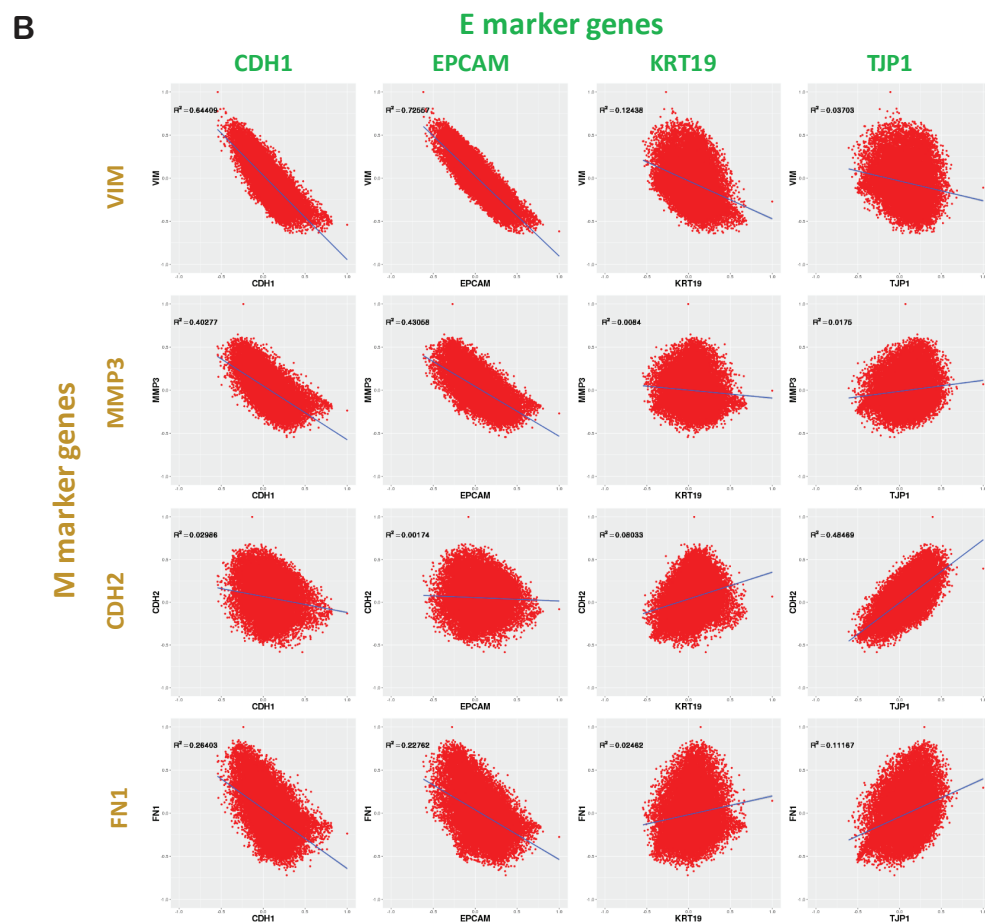

Figure S2

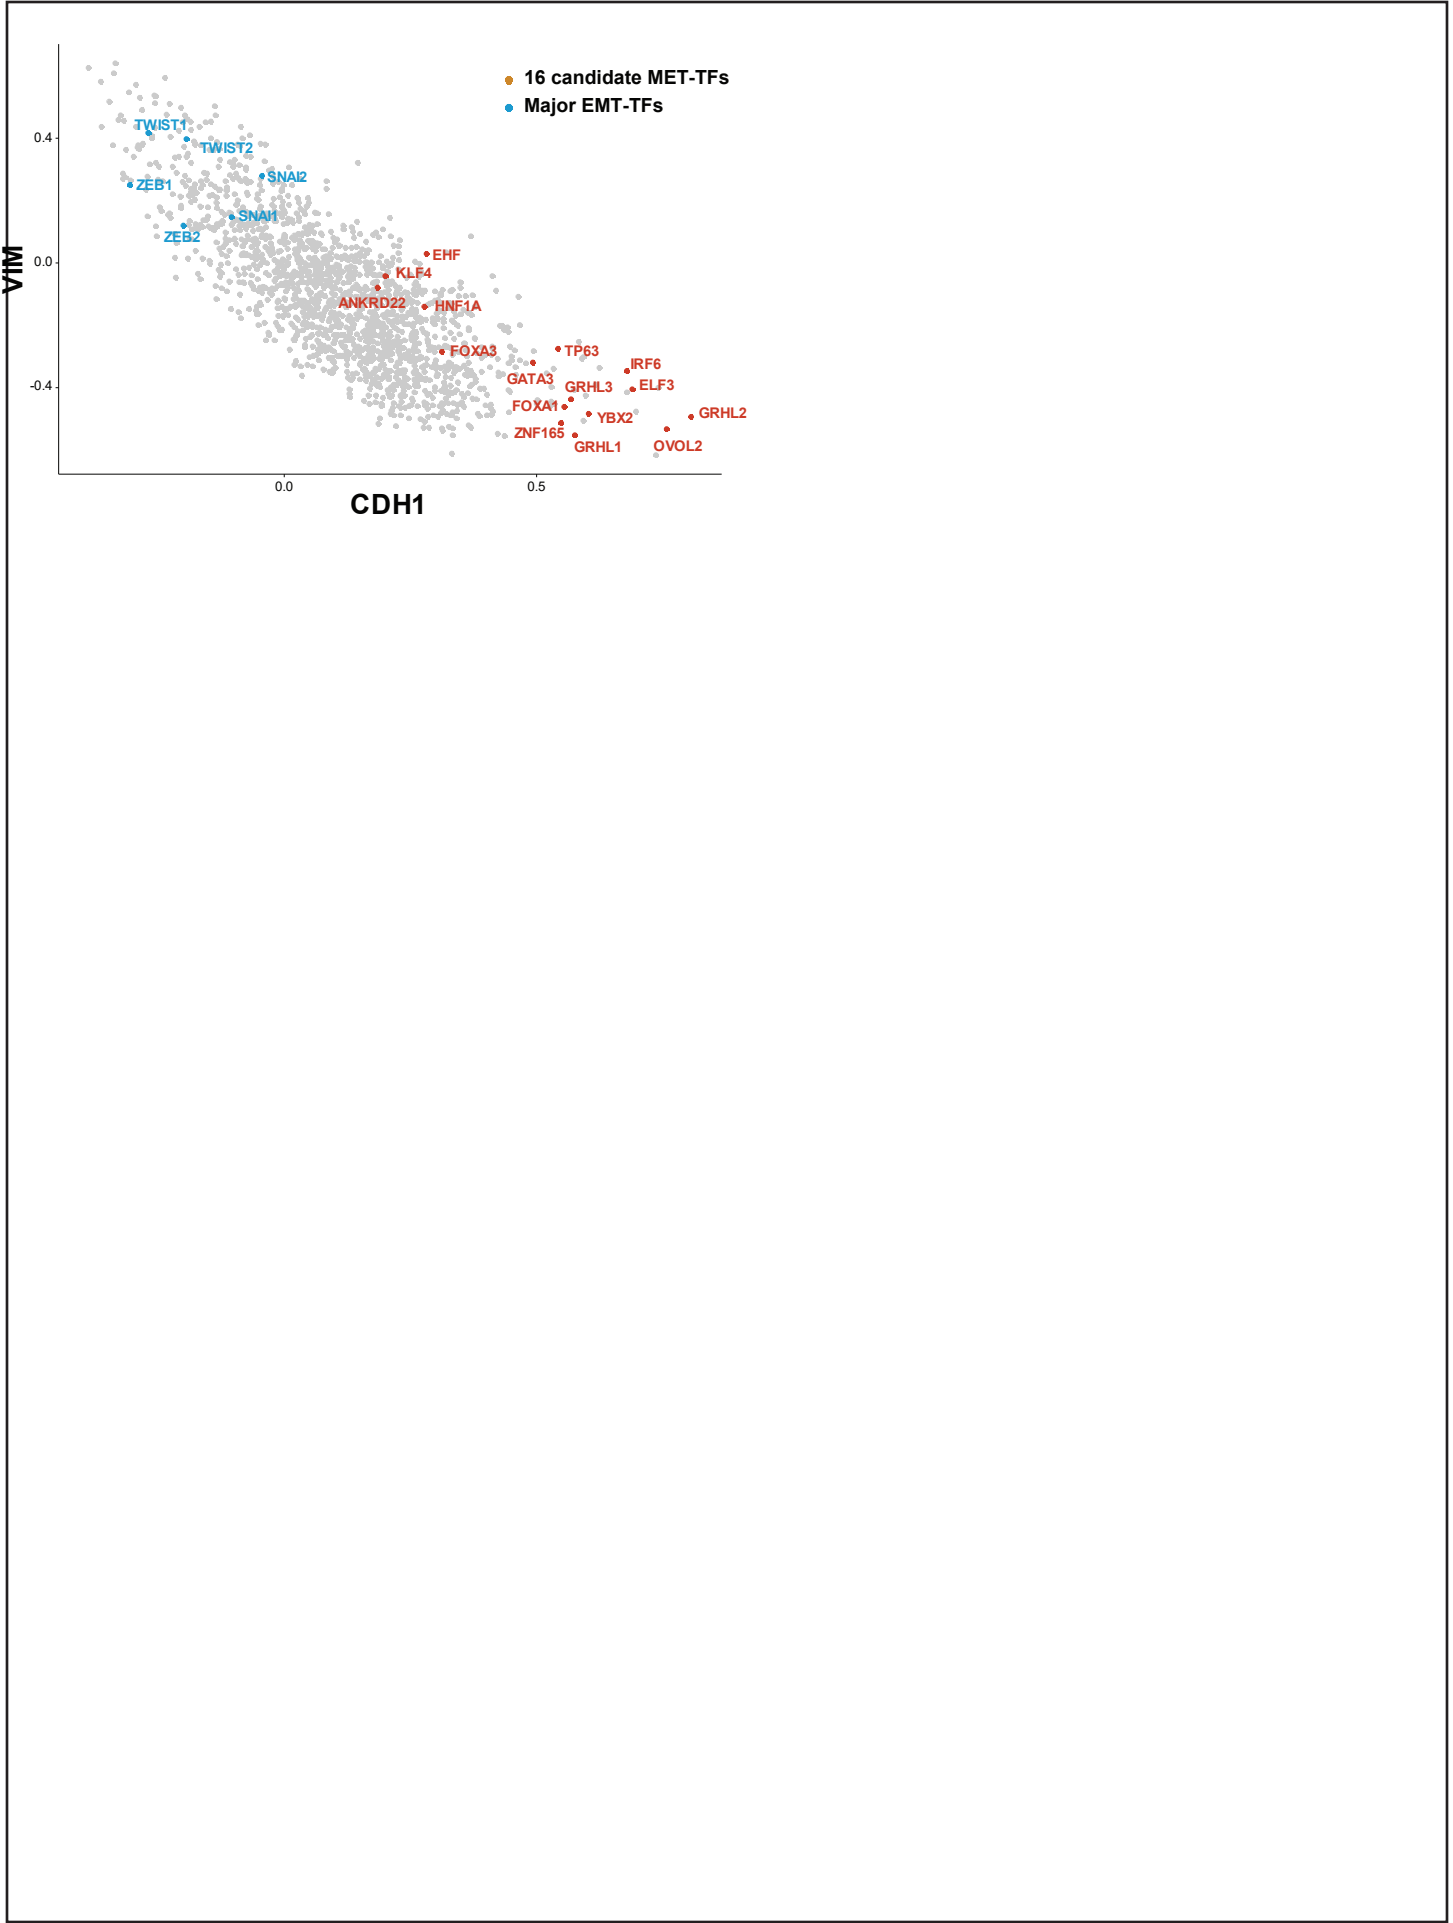

Figure S3

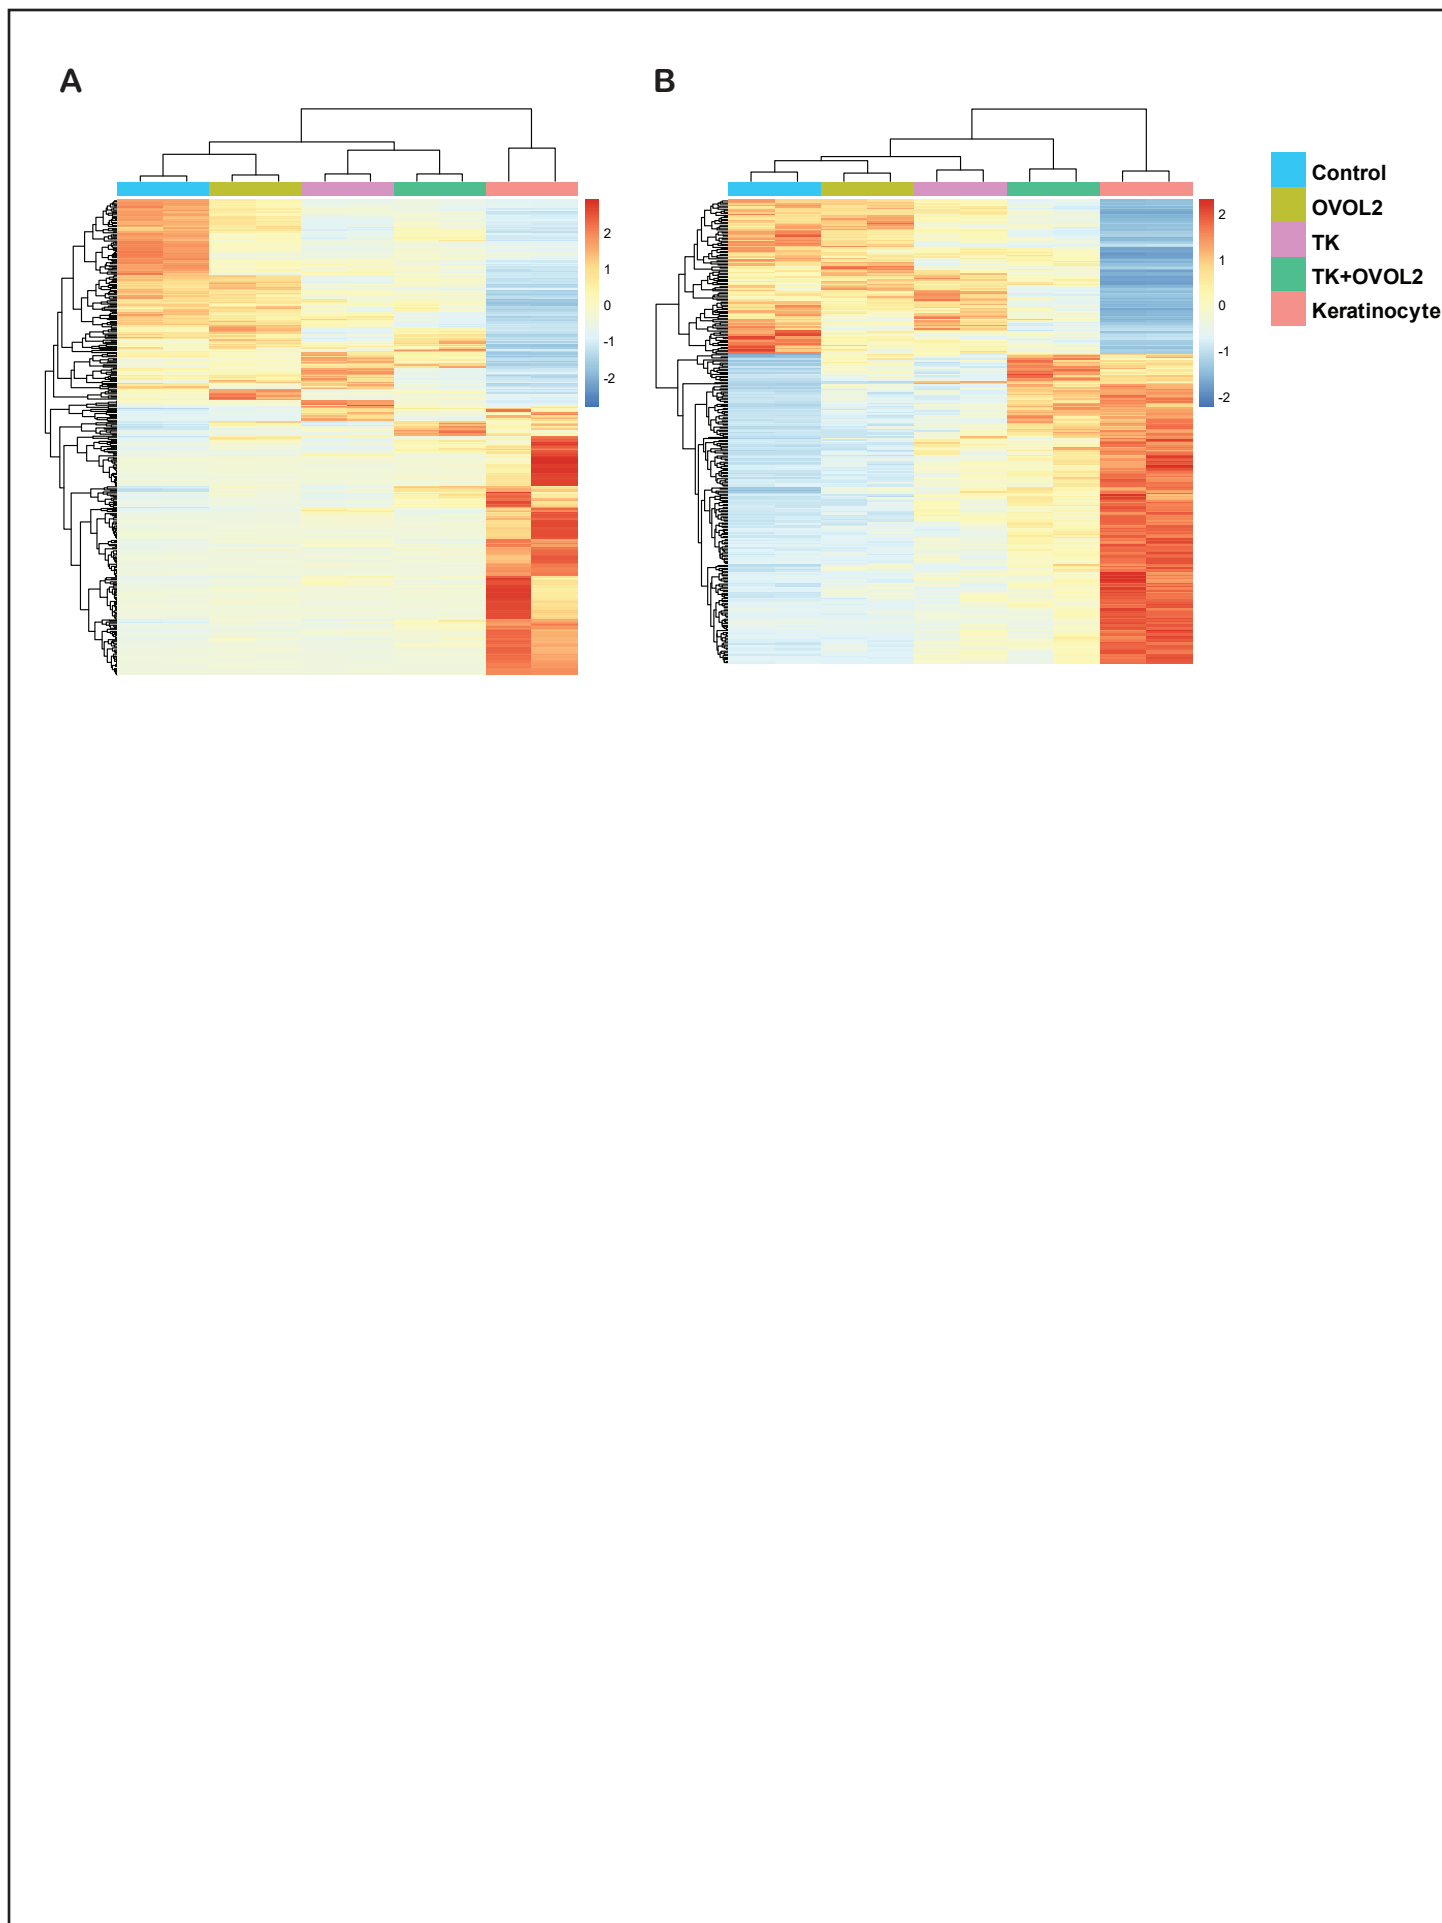

Figure S4

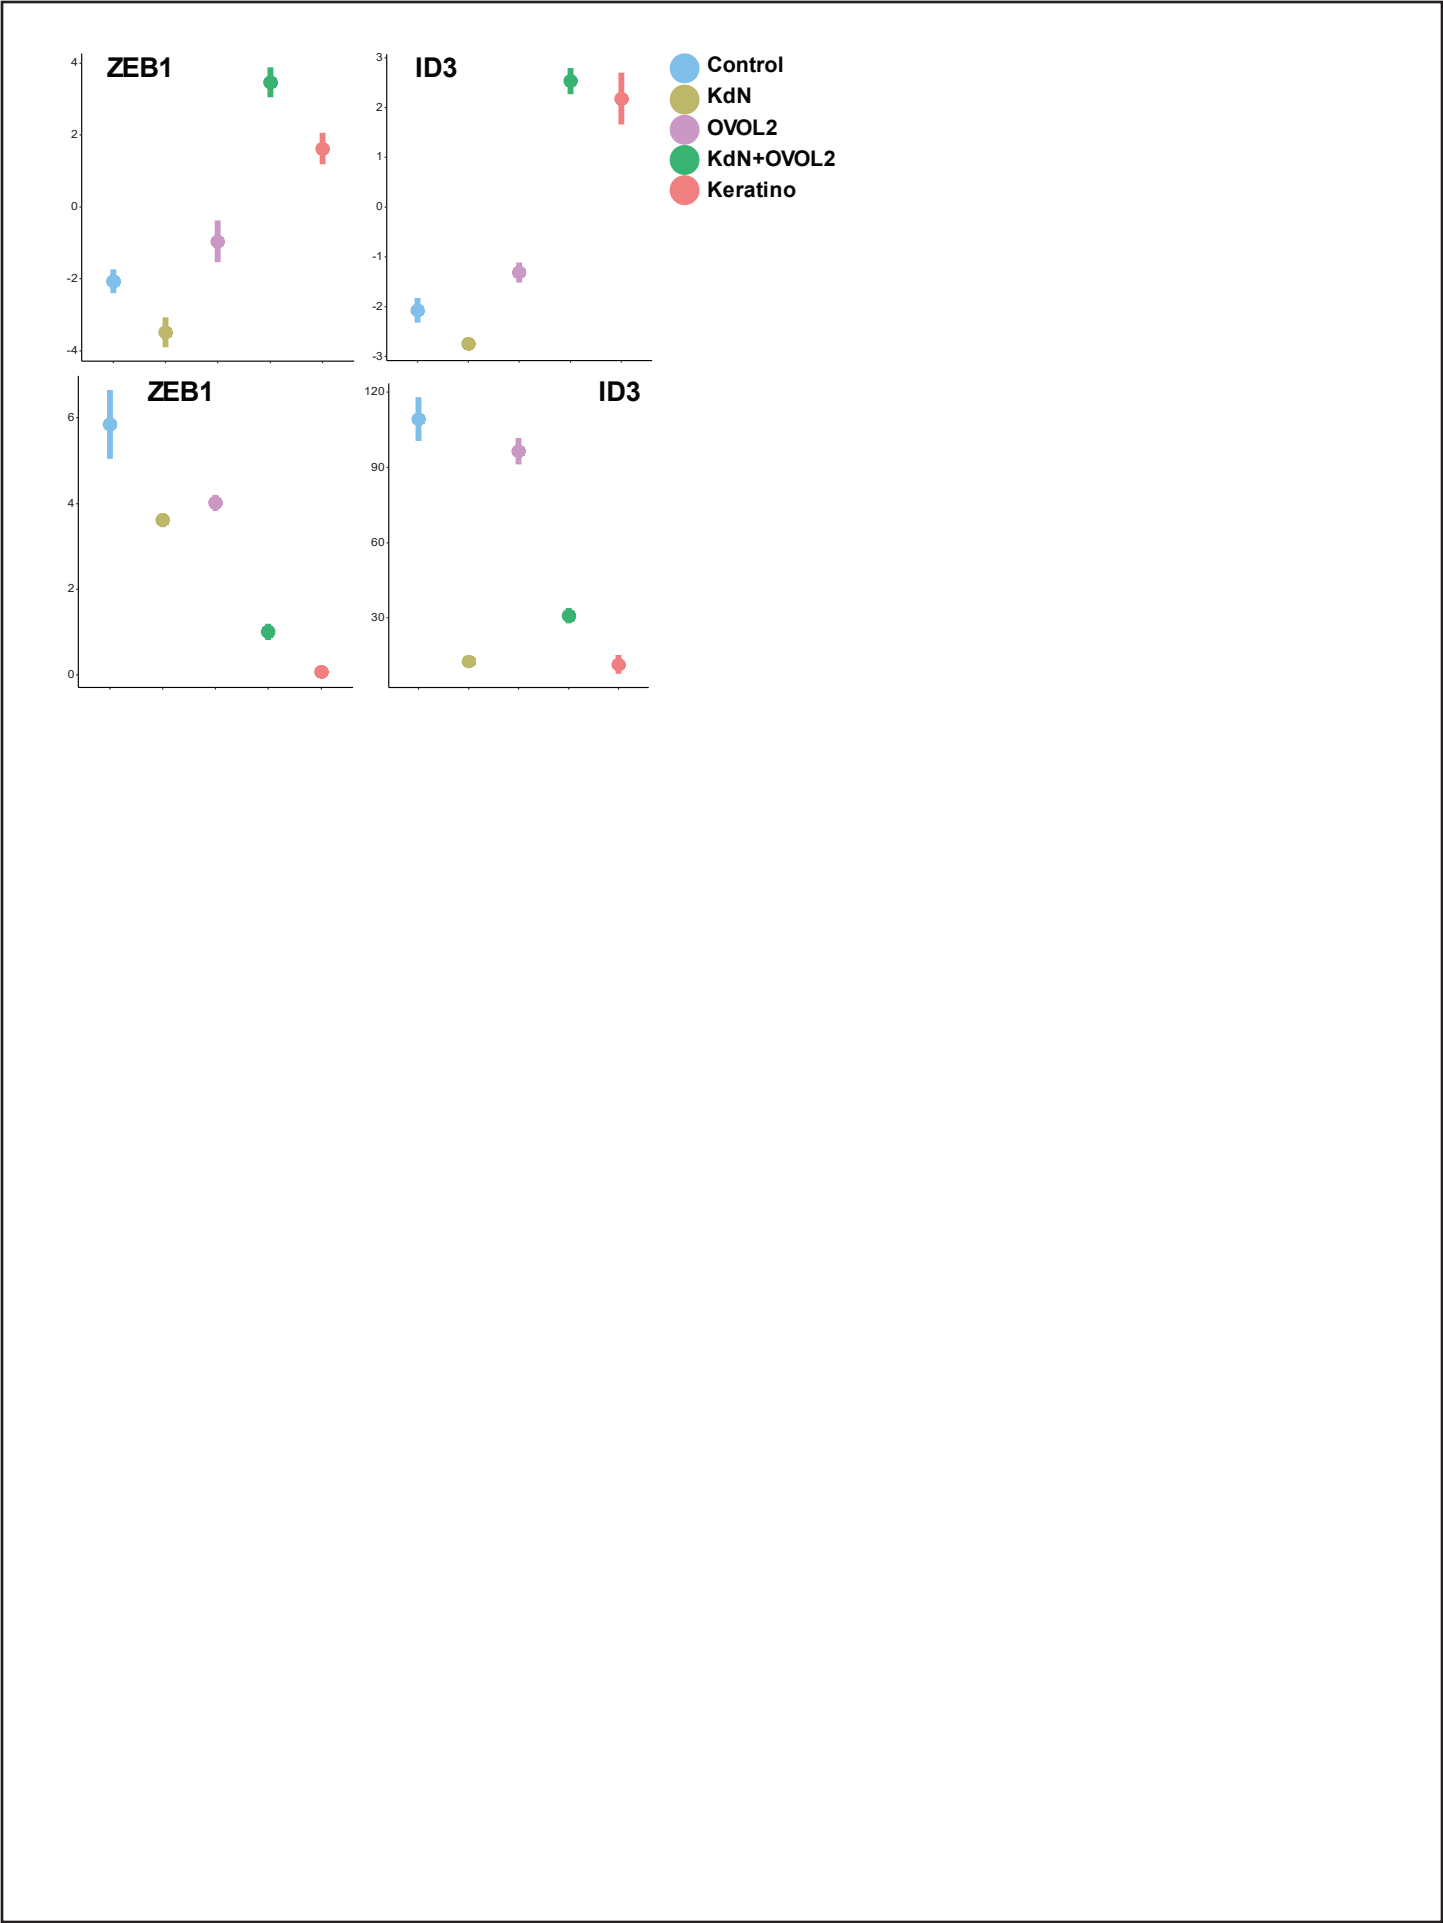

Supplement: Supplementary file 1 — Supplementary information [file 41598_2019_43021_MOESM1_ESM.pdf]
